# Supplementary material for: Nanoscale tungsten nitride/nitrogen-doped carbon as an efficient non-noble metal catalyst for hydrogen and oxygen recombination at room temperature in nickel–iron batteries
Source: Royal Society of Chemistry journal article supplement (doi:10.1039/c8ra06437g), 2018-01-01
Supplement: c8ra06437g1.pdf [file c8ra06437g1.pdf]

## Supporting Information

Nanoscale Tungsten Nitride/Nitrogen-Doped Carbon as an Efficient non-noble Metal Catalyst for Hydrogen and Oxygen Recombination at Room Temperature in Nickel-Iron Battery

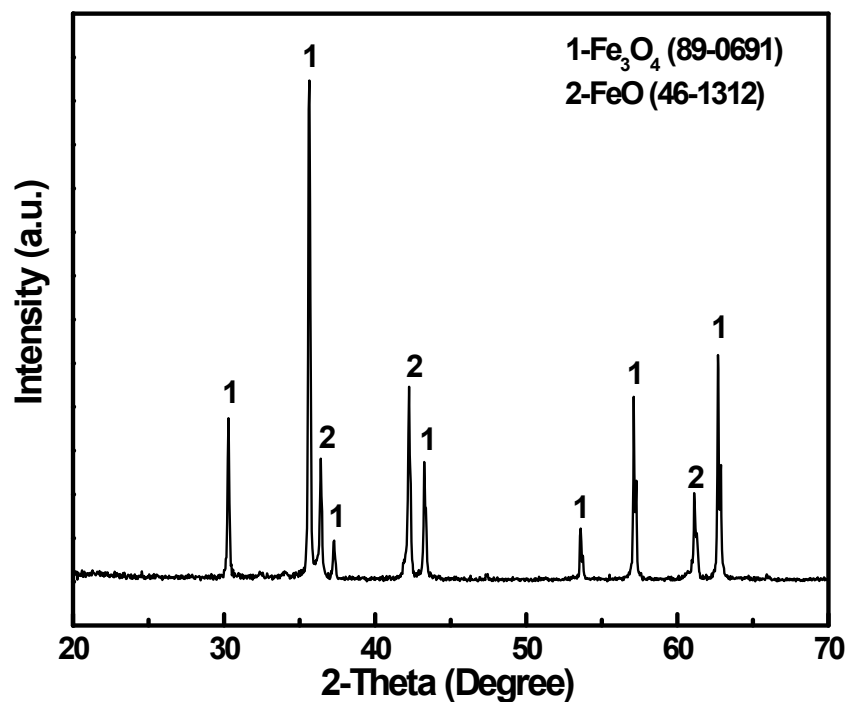

Fig. S1 XRD pattern of the powders from Sichuan CHANGHONG Battery Co., Ltd

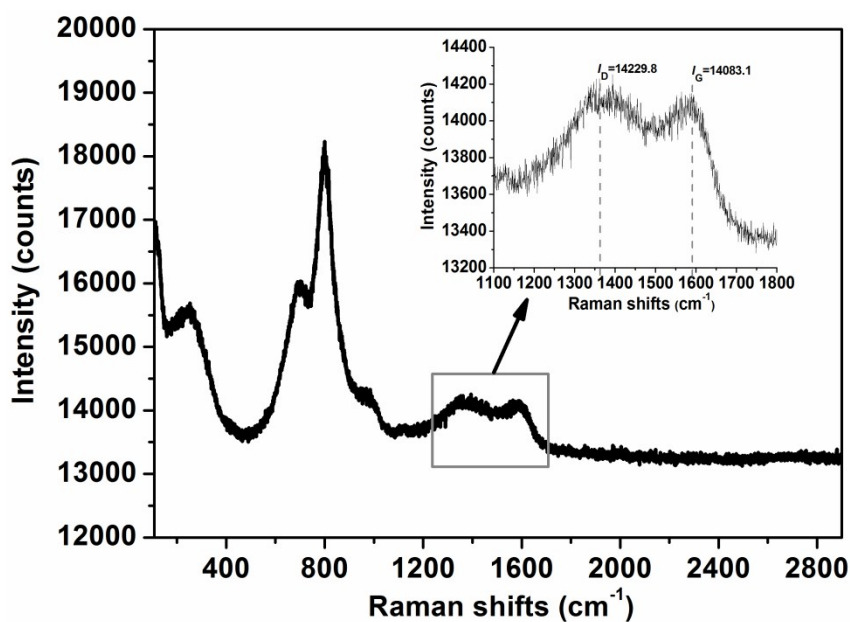

Fig. S2 Raman spectrum of the WN catalyst

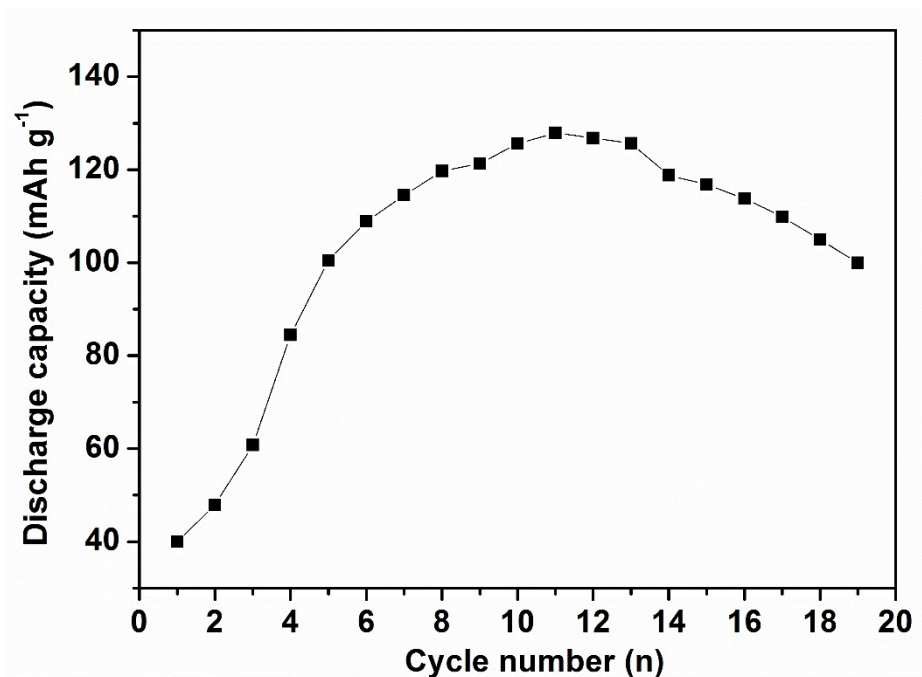

Fig. S3 The cycle performance of the nickel-iron battery without catalyst

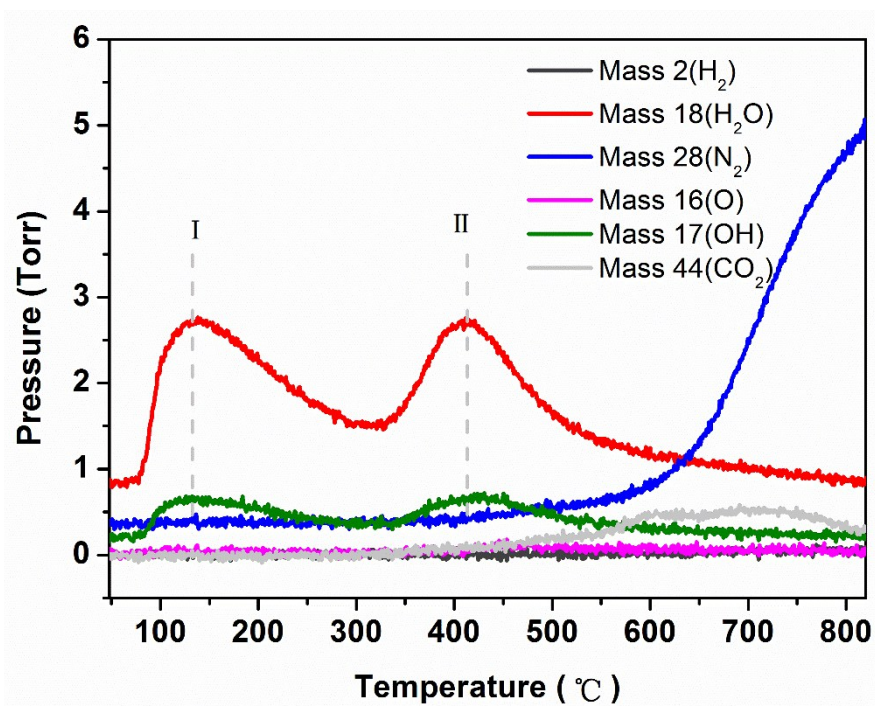

Fig. S4 TPD-MS of the WN/NC catalyst.

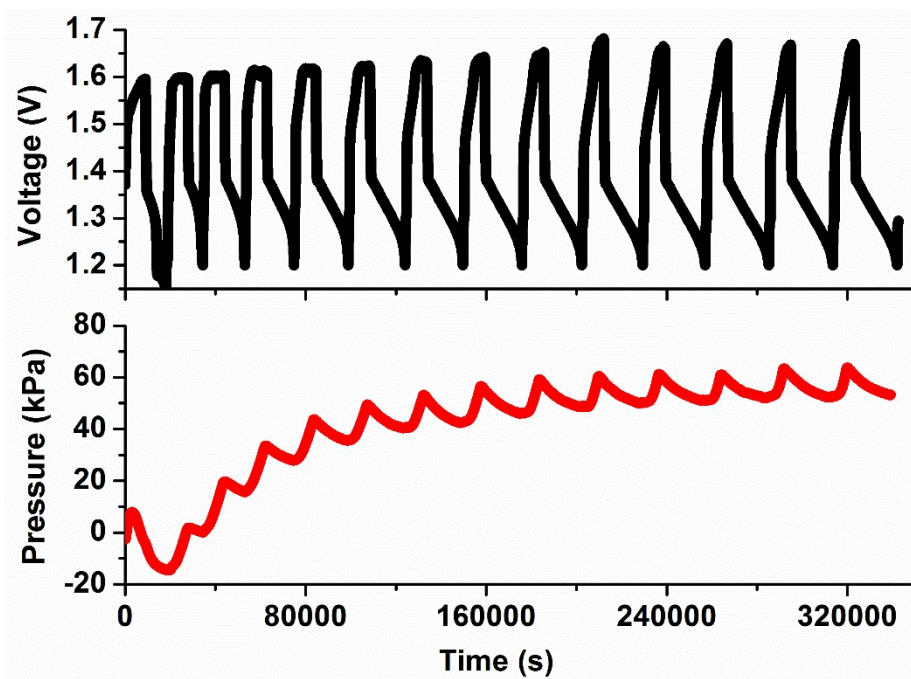

Fig. S5 The pressure versus state-of-charge results of a nickel-iron battery with WN/NC catalyst: 1<sup>st</sup>~ 14<sup>th</sup> cycles
